# Supplementary material
Source: publisher figshare collection journal article supplement (https://frontiersin.figshare.com/ndownloader/files/14106206)
Supplement: Supplementary file [file 14106206]

## Supplementary Material

*Loading values for the three-factor model of the MESSi, for the complete sample, by sex and by age groups*

|                                                      | Complete sample | Sex-based groups |       | Age-based groups        |                             |                       |
|------------------------------------------------------|-----------------|------------------|-------|-------------------------|-----------------------------|-----------------------|
|                                                      |                 | Men              | Women | 21 years old or younger | Between 22 and 31 years old | 32 years old or older |
| Morning Affect                                       |                 |                  |       |                         |                             |                       |
| CSM3 (...) getting up in the morning                 | .76             | .73              | .79   | .74                     | .76                         | .77                   |
| CSM12 (...) recover your senses in the morning (...) | .83             | .83              | .84   | .79                     | .84                         | .89                   |
| CSM4 (...) first hour after having awakened (...)    | .65             | .60              | .66   | .60                     | .66                         | .68                   |
| CIRENS 1 (...) energy level in the morning           | .75             | .73              | .76   | .75                     | .75                         | .79                   |
| CCQ4 (...) long time after awakening                 | .84             | .82              | .85   | .81                     | .84                         | .87                   |
| Eveningness                                          |                 |                  |       |                         |                             |                       |
| CIRENS 2 (...) energy level in the evening           | .58             | .49              | .59   | .56                     | .56                         | .65                   |
| CCQ5 (...) study in the evening                      | .79             | .74              | .82   | .75                     | .81                         | .84                   |
| CSM13 (...) more an evening active person            | .86             | .83              | .87   | .85                     | .86                         | .88                   |
| CCQ2 (...) think the best in the evening             | .91             | .89              | .92   | .89                     | .92                         | .94                   |
| CCQ11 (...) excellent mood in the evening            | .44             | .39              | .45   | .45                     | .44                         | .41                   |

|                                          | Complete sample | Sex-based groups |       | Age-based groups        |                             |                       |
|------------------------------------------|-----------------|------------------|-------|-------------------------|-----------------------------|-----------------------|
|                                          |                 | Men              | Women | 21 years old or younger | Between 22 and 31 years old | 32 years old or older |
|                                          |                 | Distinctness     |       |                         |                             |                       |
| CCQ6 (...) same throughout the day       | .46             | .40              | .45   | .42                     | .48                         | .46                   |
| CCQ8 (...) focus at any time of the day  | .63             | .60              | .61   | .56                     | .62                         | .77                   |
| CCQ10 (...) motivation is the same       | .57             | .51              | .58   | .55                     | .55                         | .64                   |
| CCQ14 (...) feel unable to do anything   | .69             | .68              | .71   | .70                     | .69                         | .73                   |
| CCQ15 (...) it is harder for me to think | .72             | .73              | .72   | .73                     | .71                         | .79                   |

*Notes.* Completely standardized loading values are presented. Only short versions of the items are presented; the full provisional English version of the items and the coding instructions are available at [https://www.researchgate.net/publication/315011478\\_MESSi\\_English\\_ResGate\\_Items\\_and\\_Coding](https://www.researchgate.net/publication/315011478_MESSi_English_ResGate_Items_and_Coding)
